# Supplementary material for: Fluorescein as an artificial enzyme to mimic peroxidase
Source: Royal Society of Chemistry journal article supplement (doi:10.1039/c6cc07896f), 2016-01-01
Supplement: c6cc07896f1.pdf [file c6cc07896f1.pdf]

## Electronic Supplementary Information

### Fluorescein as an artificial enzyme to mimic peroxidase

Li Liu <sup>1,2</sup>, Ying Shi, Yufang Yang<sup>1</sup>, Menglu Li<sup>1</sup>, Yijuan Long<sup>1</sup>, Yuming Huang<sup>1\*</sup>,  
Huzhi Zheng<sup>1\*</sup>

<sup>1</sup>Key Laboratory on Luminescent and Real-Time Analytical Chemistry, Ministry of Education,  
College of Chemistry and Chemical Engineering, Southwest University, Chongqing 400715, P. R.  
China

<sup>2</sup>College of Chemistry and Chemical Engineering, Qujing Normal University, Qujing, 655011, P.  
R. China

\*Corresponding authors. E-mail addresses: ymhuang@swu.edu.cn (Y. Huang);  
zhenghz@swu.edu.cn (H. Zheng).

---

## Experimental

### Reagents and chemicals

Horseshoe peroxidase (HRP, 300 U mg<sup>-1</sup>), fluorescein (Reagent Ph. Eur. grade) and 3,3',5,5'-tetramethylbenzidine (TMB) (99%) were purchased from Sigma-Aldrich. H<sub>2</sub>O<sub>2</sub> (30%) was purchased from Chongqing Chuandong Chemical Co., Ltd. (Chongqing, China). Acetate (HPLC grade, ≥99.9%) was obtained from Shanghai Mackin biochemical Co. Ltd. (Shanghai, China). Fluorescein chloride (HPLC grade, 95.0%) and Fluorescein diacetate (HPLC grade, 98.0%) were purchased from TCI Chemical Industry (Tokyo, Japan). Rhodamine B (HPLC grade, 95.0%), rhodamine 6G (95%) and sodium acetate anhydrous (99.99% metals basis) were obtained from Aladdin (Shanghai, China). All other reagents were of analytical grade and were used directly with no further purification. Ultrapure water (18.2 MΩ) was prepared with a Milli-Q system (USA) and used in all experiments.

### Electron spin resonance (ESR)

DMPO was used to trap the •OH radicals to form the DMPO/•OH spin adduct. 50 mM DMPO, 10 mM H<sub>2</sub>O<sub>2</sub> and fluorescein with different concentrations were added in 0.20 M HAc-NaAc buffer solutions (pH 3.0), and then the prepared samples were transferred to a quartz capillary tube and placed in the ESR cavity. The ESR spectra were recorded on an X-band JES FA200 ESR Spectrometer (JEOL, Japan) (sweep time 60 s; modulation width, 0.1 mT; modulation amplitude, 2 Gauss; frequency power, 0.998 mW; modulation frequency, 9.066 GHz).

### Peroxidase-like activity of fluorescein

In the presence of H<sub>2</sub>O<sub>2</sub>, the peroxidase-like activity of fluorescein was evaluated through the catalytic oxidation of peroxidase substrate TMB with major absorbance peaks at 652nm. In a typical experiment, 125 μL of fluorescein (2.0 mM in ethanol anhydrous solution), followed by 125 μL of TMB solution (12 mM) and 250 μL of H<sub>2</sub>O<sub>2</sub> (100 mM) were added into 2.0 mL HAc-NaAc buffer solution (0.20 M, pH 3.0).

---

The absorbance change at 652 nm was recorded using a UV-2450 UV-Vis spectrophotometer (Shimadzu, Japan).

### **Robustness and stability of the fluorescein as enzyme mimic**

To examine its robustness, fluorescein was first incubated at a range of temperatures from 4 to 90 °C, a range of pH values from 1 to 12 and a range of NaCl concentrations from 0 to 500 mM for 2 h, respectively. Then their activities were measured under conditions identical to those mentioned above. Activity of 100% is set where absorption is highest and the relative activities for other absorptions are calculated accordingly. Error bars represent the standard deviation of three independent measurements.

### **Kinetic Assay**

Kinetic measurements were carried out by monitoring the absorbance change at 652 nm with a 1 min interval. Experiments were carried out using 1.0 ng mL<sup>-1</sup> HRP in 4.0 mL of 0.20 M phosphate buffer (pH 5.0) at 35°C or 100 µM fluorescein in 4.0 mL of 0.20 M NaAc buffer (pH 3.0) at 35°C. To investigate double reciprocal plots of activity of fluorescein, assays were carried out under standard reaction conditions as described above by varying concentrations of TMB at a fixed concentration of H<sub>2</sub>O<sub>2</sub> or vice versa. The Michaelis-Menten constant was calculated using the Lineweaver-Burk plot:  $1/v = K_m / (V_{max}[S]) + 1/V_{max}$ , where  $v$  is the initial velocity,  $V_{max}$  is the maximal reaction velocity, and  $[S]$  corresponds to the substrate concentration.

### **Ultra performance liquid chromatography-mass spectrum (UPLC-MS) Analysis**

A Waters (Milford, MA) Xevo TQ-S mass spectrometer coupled to a Waters ACQUITY H-Class UPLC system was used. Separation was carried out with a Waters BEH C18 column (2.1 × 50 mm, 1.7 µm particle size) with column oven temperature at 40 °C. The injection volume was 10 µL, and the UPLC flow rate was 200 µL/min using an isocratic elution mobile phase with 50% water and 50% 0.1% formic acid in methanol.

---

Mass spectra were acquired using electrospray ionization in positive ion mode and multiple reaction monitoring (MRM). Nitrogen was used as desolvation gas at a flow rate of 650 L/h; argon at a pressure around  $3.0 \times 10^{-3}$  mbar was used as collision gas at a flow rate of 0.15 ml/min. The ion source and the desolvation temperature were maintained at 150 and 350 °C, respectively. Collision energy was set at 45, 35 electron volt, respectively, for the above mentioned transitions at a delay time of 0.005 s. All aspects of system operation and data acquisition were controlled using Masslynx v4.1 software with automated data processing using the Quanlynx Application Manager (Waters).

### **Detection Procedure of H<sub>2</sub>O<sub>2</sub>**

H<sub>2</sub>O<sub>2</sub> detection was carried out as follows: 125 μL of 2.0 mM fluorescein, 125 μL of 12 mM TMB and 250 μL of different concentrations of H<sub>2</sub>O<sub>2</sub> were added into 2.0 mL of 0.20 M HAc-NaAc buffer solution (pH 3.0). The resulting mixture was incubated at 35 °C for 30 min. Then UV-vis spectra measurements were taken.

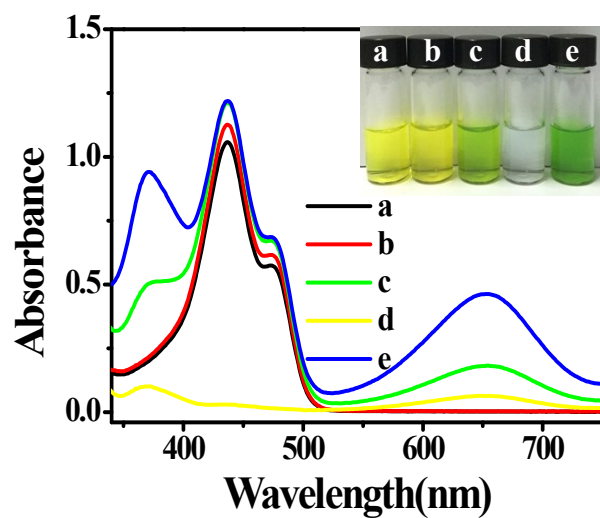

**Fig. S1** UV-vis absorbance spectra of different reaction systems: (a) 100  $\mu\text{M}$  fluorescein (black line), (b) 100  $\mu\text{M}$  fluorescein + 10 mM  $\text{H}_2\text{O}_2$  (red line), (c) 100  $\mu\text{M}$  fluorescein + 0.60 mM TMB (green line), (d) 0.60 mM TMB + 10 mM  $\text{H}_2\text{O}_2$  (yellow line), (e) 0.6 mM TMB + 10 mM  $\text{H}_2\text{O}_2$  + 100  $\mu\text{M}$  fluorescein (blue line) in NaAc buffer (pH 3.0) after incubation for 30 min at 35  $^\circ\text{C}$ . The insert shows the corresponding optical photographs.

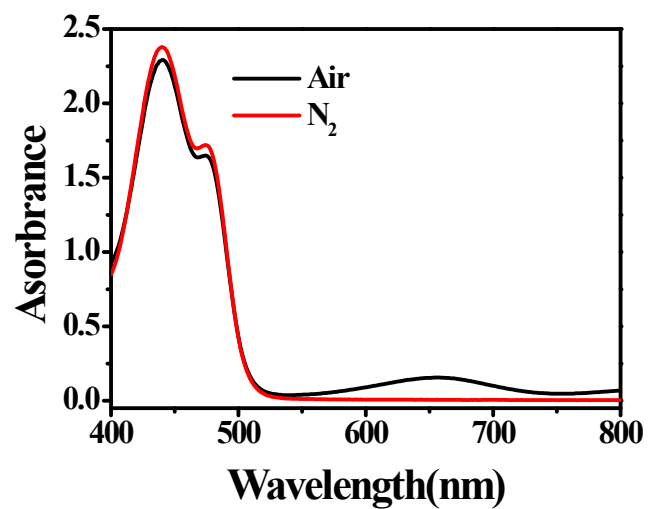

**Fig. S2** The absorbance spectra of TMB in the presence of fluorescein in an air (black line) or N<sub>2</sub> atmosphere for 30 min (red line). Reaction condition: 0.60 mM TMB and 50  $\mu$ M fluorescein in NaAc buffer (pH 3.0) for 30 min.

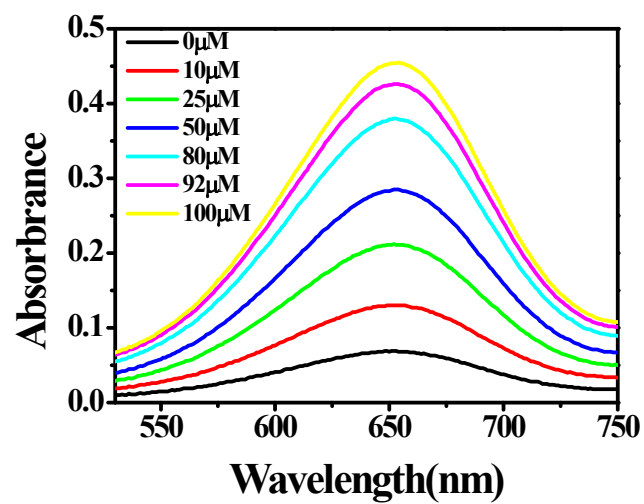

**Fig. S3** The absorbance spectra of the TMB in the presence of fluorescein with different concentrations. Reaction conditions: 0.60 mM TMB, 10 mM H<sub>2</sub>O<sub>2</sub>, 0.20 M acetate buffer (pH 3.0), 35°C for 30min.

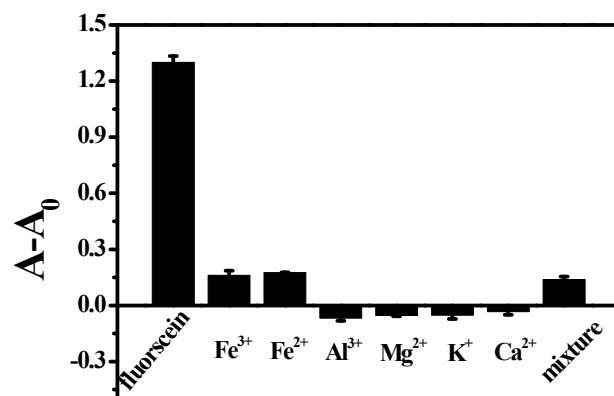

**Fig. S4** Catalytic activity of metal ions. 0.60 mM TMB and 10 mM H<sub>2</sub>O<sub>2</sub> in 0.20 M NaAc buffer (pH 3.0, 35°C) in the presence of a kind of metal ion or a mixture of five metal ions ( Fe<sup>3+</sup> , Al<sup>3+</sup> , Mg<sup>2+</sup> , K<sup>+</sup> and Ca<sup>2+</sup>) were used to test the catalytic activity. The final concentrations of fluorescein, Fe<sup>3+</sup>, Fe<sup>2+</sup>, Al<sup>3+</sup>, Mg<sup>2+</sup> , Ca<sup>2+</sup> and K<sup>+</sup> were 100 μM, 30, 30, 50, 50, 50 and 50 nM, respectively. A<sub>0</sub> and A is the absorbance in the absence and presence of fluorescein.



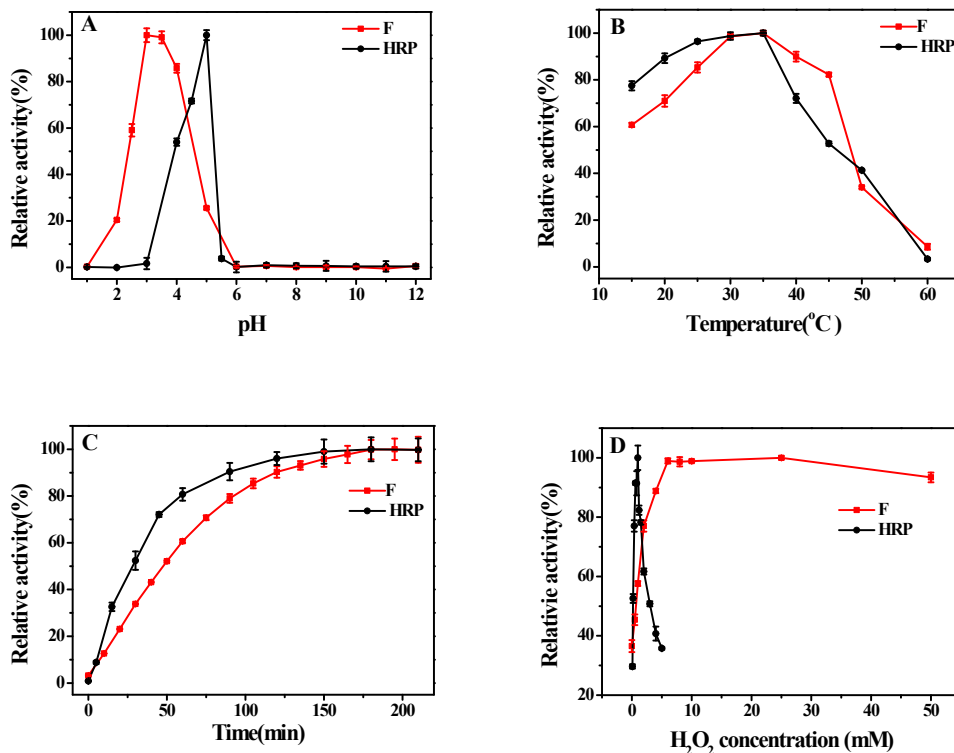

**Fig. S5** Effects of pH (A), temperature (B), reaction time (C), H<sub>2</sub>O<sub>2</sub> concentration (D) on the peroxidase-like activity of fluorescein (red line) and HRP (black line). Experiments were carried out using 100  $\mu$ M fluorescein or 1.0 ng mL<sup>-1</sup> HRP. Details were showed in the Experimental Section. For each curve, the maximal point was set as 100%, and the relative activities for other absorptions were calculated accordingly. Error bars indicate the standard deviations of three independent measurements.

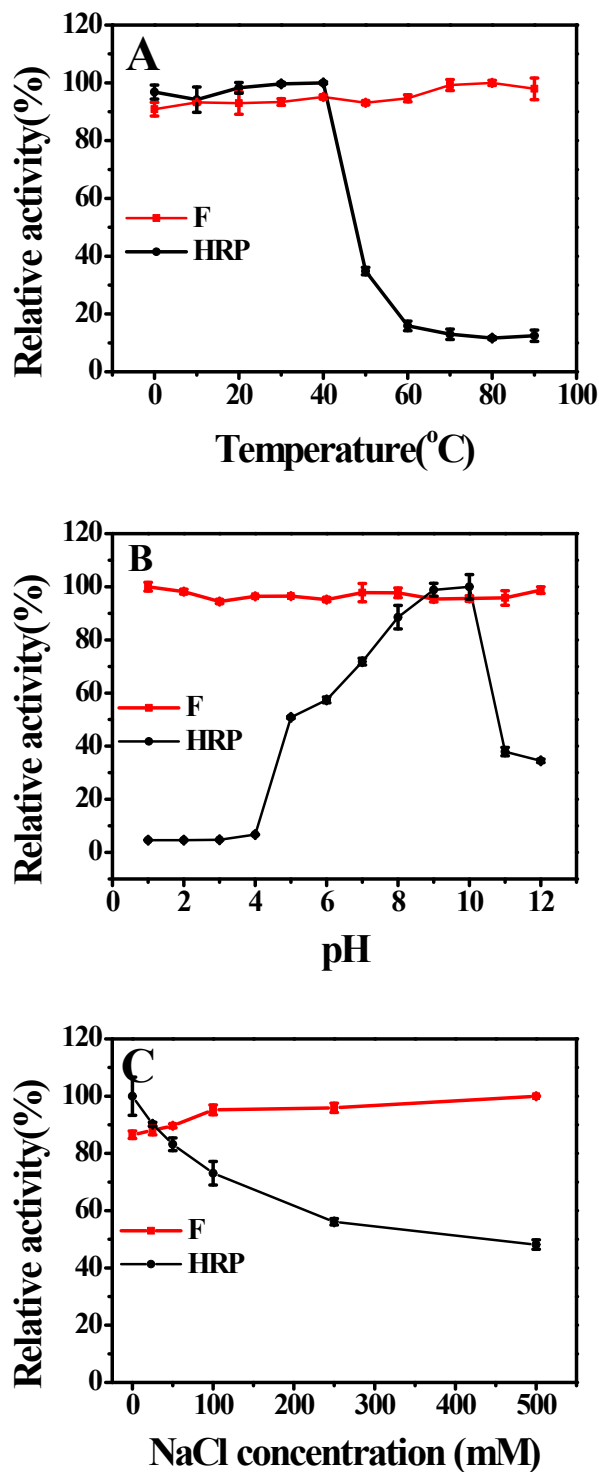

**Fig. S6** Comparison of stability of fluorescein (red line) and HRP (black line) towards the relative catalytic activity after incubation at different temperatures (A), at a range of pH values (B), at a range concentrations of NaCl (C) for 2 h, and the activity was measured under optimum conditions. For each curve, the maximum point was set as 100% and the relative activities for other absorptions were calculated accordingly. Error bars indicate the standard deviations of three independent measurements.

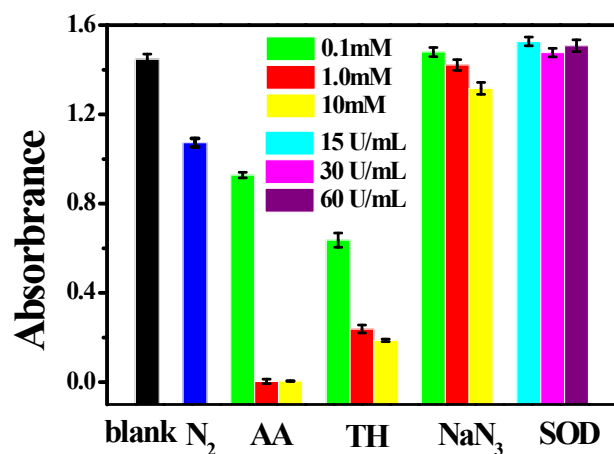

**Fig. S7 Effects of scavengers on the TMB-H<sub>2</sub>O<sub>2</sub>-fluorescein chromogenic reaction.**

Absorbance of oxTMB at 652 nm have been monitored in presence of different radical scavengers: blank (without any scavenger), AA (ascorbic acids), TH (thiourea), NaN<sub>3</sub> and SOD. Procedures: 0.60 mM TMB, 10 mM H<sub>2</sub>O<sub>2</sub>, 100μM fluorescein and different concentration scavenger were mixed in 0.20 M NaAc (pH 3.0), at 35°C for 180 min incubation.

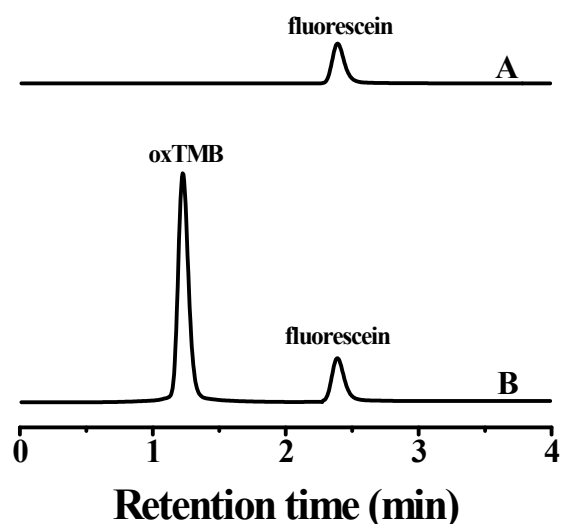

**Fig. S8** Representative chromatogram of (A) 100 $\mu$ M fluorescein and (B) 0.60 mM TMB + 10 mM H<sub>2</sub>O<sub>2</sub> + 100 $\mu$ M fluorescein were incubated under optimal conditions.

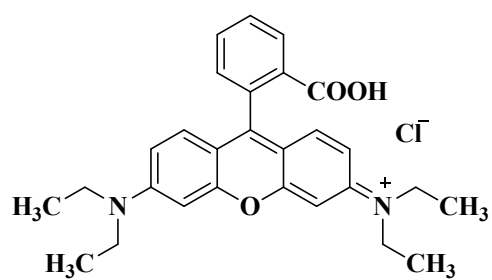

**Rhodamine B (inactive)**

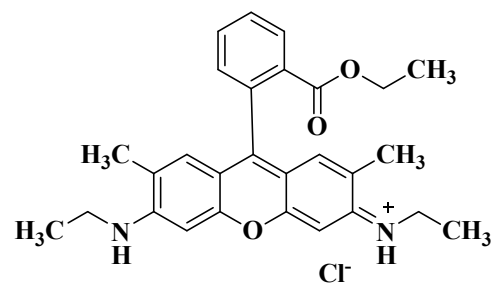

**Rhodamine 6G (inactive)**

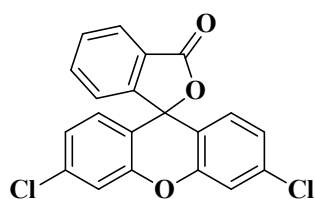

**Fluorescein Chloride (inactive)**

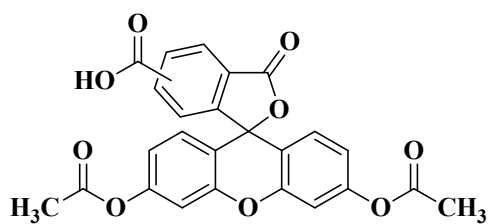

**Fluorescein diacetate (inactive)**

**Fig. S9 Structures of four kinds of xanthene dyes**

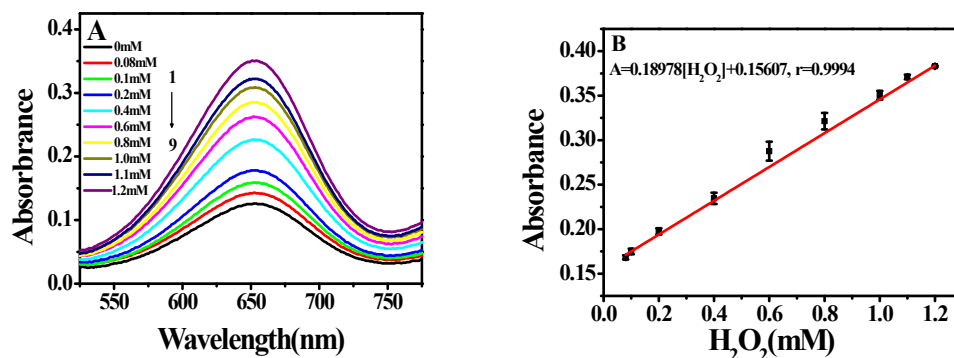

**Fig. S10** (A) UV-visible spectra of fluorescein system with different concentration of H<sub>2</sub>O<sub>2</sub>. (B) A calibration curve for H<sub>2</sub>O<sub>2</sub> detection at 652 nm under the optimum conditions.

---

**Table S1 IPC-MS analysis of element content in fluorescein**

| Element | Content(%)       | Element | Content(%) | Element | Content(%) | Element | Content(%) |
|---------|------------------|---------|------------|---------|------------|---------|------------|
| Al      | 0.0015% (18 nM)  | W       | <0.0001    | Co      | <0.0001    | Sb      | <0.0001    |
| Ca      | 0.0056% (47 nM)  | Li      | <0.0001    | Ni      | <0.0001    | Sn      | <0.0001    |
| Fe      | 0.0051% (30 nM)  | Be      | <0.0001    | As      | <0.0001    | Pb      | <0.0001    |
| Mg      | 0.0006% (8.3 nM) | Ti      | <0.0001    | Cu      | <0.0001    | Hg      | <0.0001    |
| K       | 0.0015% (13 nM)  | V       | <0.0001    | Zn      | <0.0001    | Cr      | <0.0001    |
| Na      | 0.024            | Mn      | <0.0001    | Mo      | <0.0001    | P       | 0.0005     |

---

**Table S2.** Waters (Milford, MA) Xevo TQ-S mass spectrometry parameters used to analyze the catalytic productions

| Compound    | Migration time (min) | MRM ( <i>m/z</i> ) | Cone (v) | Collision energy (v) | Dwell(s) |
|-------------|----------------------|--------------------|----------|----------------------|----------|
| fluorescein | 2.39                 | 333.27>202.11      | 35       | 45                   | 0.1      |
| TMB         | 1.22                 | 240.22>195.11      | 35       | 35                   | 0.1      |
